# Supplementary material
Source: Springer Nature journal article supplement (https://www.springermedizin.de/resource/supplementary/12967_2013_1651_MOESM4_ESM.pdf/9574552)

**A. Fat only**

**B. Fat + ADRC ( $\times 1$ )**

**C. Fat + ADRC ( $\times 5$ )**

**D. Fat + ADRC ( $\times 10$ )**

**A**

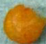

**B**

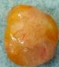

**C**

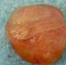

**D**

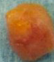

cm

1

2

3

4

5

**SPECIMEN** \_\_\_\_\_

**DATE** \_\_\_\_\_

Supplement: MOESM4 [file 9574552]
